# Supplementary material
Source: PubMed Central journal article supplement (PMC9976596)
Supplement: NIHMS1873067-supplement-supinfo.pdf [file NIHMS1873067-supplement-supinfo.pdf]

## SUPPLEMENTARY TABLES

### Impact of obesity and white adipose tissue inflammation on the omental microenvironment in endometrial cancer

Moukarzel et al.

**Supplementary Table 1: Blood measurements based on presence or absence of white adipose inflammation in patients with endometrial cancer.**

| <b>Variable</b>     | <b>CLS-B negative</b>    | <b>CLS-B positive</b>     | <b>P-value</b>   |
|---------------------|--------------------------|---------------------------|------------------|
| Glucose (mg/dL)     | 101.4 (95.7-113.8)       | 105.3 (96.9-122.3)        | 0.4              |
| Insulin (mU/L)      | 7.2 (4.8-13.4)           | 7.8 (6.3-14.6)            | 0.3              |
| Leptin (pg/mL)      | 17766.0 (9295.8-47787.0) | 40635.0 (22809.5-66333.0) | <b>&lt;0.001</b> |
| Adiponectin (ug/mL) | 10.2 (6.1-14.4)          | 6.2 (4.7-10.8)            | <b>0.017</b>     |
| SHBG (nmol/L)       | 54.5 (43.3-68.3)         | 40.8 (25.3-54.7)          | <b>0.001</b>     |
| hsCRP (ng/mL)       | 2201.0 (910.8-6389.0)    | 5596.5 (2909.2-10036.8)   | <b>0.020</b>     |
| IL6 (pg/mL)         | 1.9 (1.1-4.0)            | 2.6 (2.0-3.8)             | <b>0.038</b>     |

All data is presented as median, interquartile range  
SHBG, sex hormone binding globulin



**Supplementary Table S3. Differential gene expression of immune related genes (IRGs) between CLS-positive versus CLS-negative adipose tissue in patients with endometrial cancer.**

| <b>Gene Symbol</b> | <b>logFC</b> | <b>AveExpr</b> | <b>t</b> | <b>P.Value</b> | <b>FDR</b> | <b>B</b> |
|--------------------|--------------|----------------|----------|----------------|------------|----------|
| LTBP2              | 0.528395     | 7.154708       | 4.390862 | 5.03E-05       | 0.045933   | 1.783676 |
| CHIT1              | 1.775624     | 2.074897       | 4.228345 | 8.74E-05       | 0.045933   | 1.346057 |
| SAA1               | 1.363811     | 10.14554       | 3.846524 | 0.000308       | 0.07277    | 0.22463  |
| IL1RN              | 1.30178      | 1.074527       | 3.783202 | 0.000377       | 0.07277    | 0.039344 |
| MMP9               | 1.393097     | 2.297905       | 3.771805 | 0.000391       | 0.07277    | 0.025792 |
| RORB               | -1.27273     | 1.416761       | -3.75311 | 0.000415       | 0.07277    | -0.03257 |
| C5                 | -0.32684     | 4.024201       | -3.58295 | 0.00071        | 0.097271   | -0.60672 |
| PSMD1              | 0.238834     | 6.457562       | 3.56949  | 0.00074        | 0.097271   | -0.75234 |
